# Supplementary material
Source: PubMed Central journal article supplement (PMC10842462)
Supplement: NIHMS1941937-supplement-1.pdf [file NIHMS1941937-supplement-1.pdf]

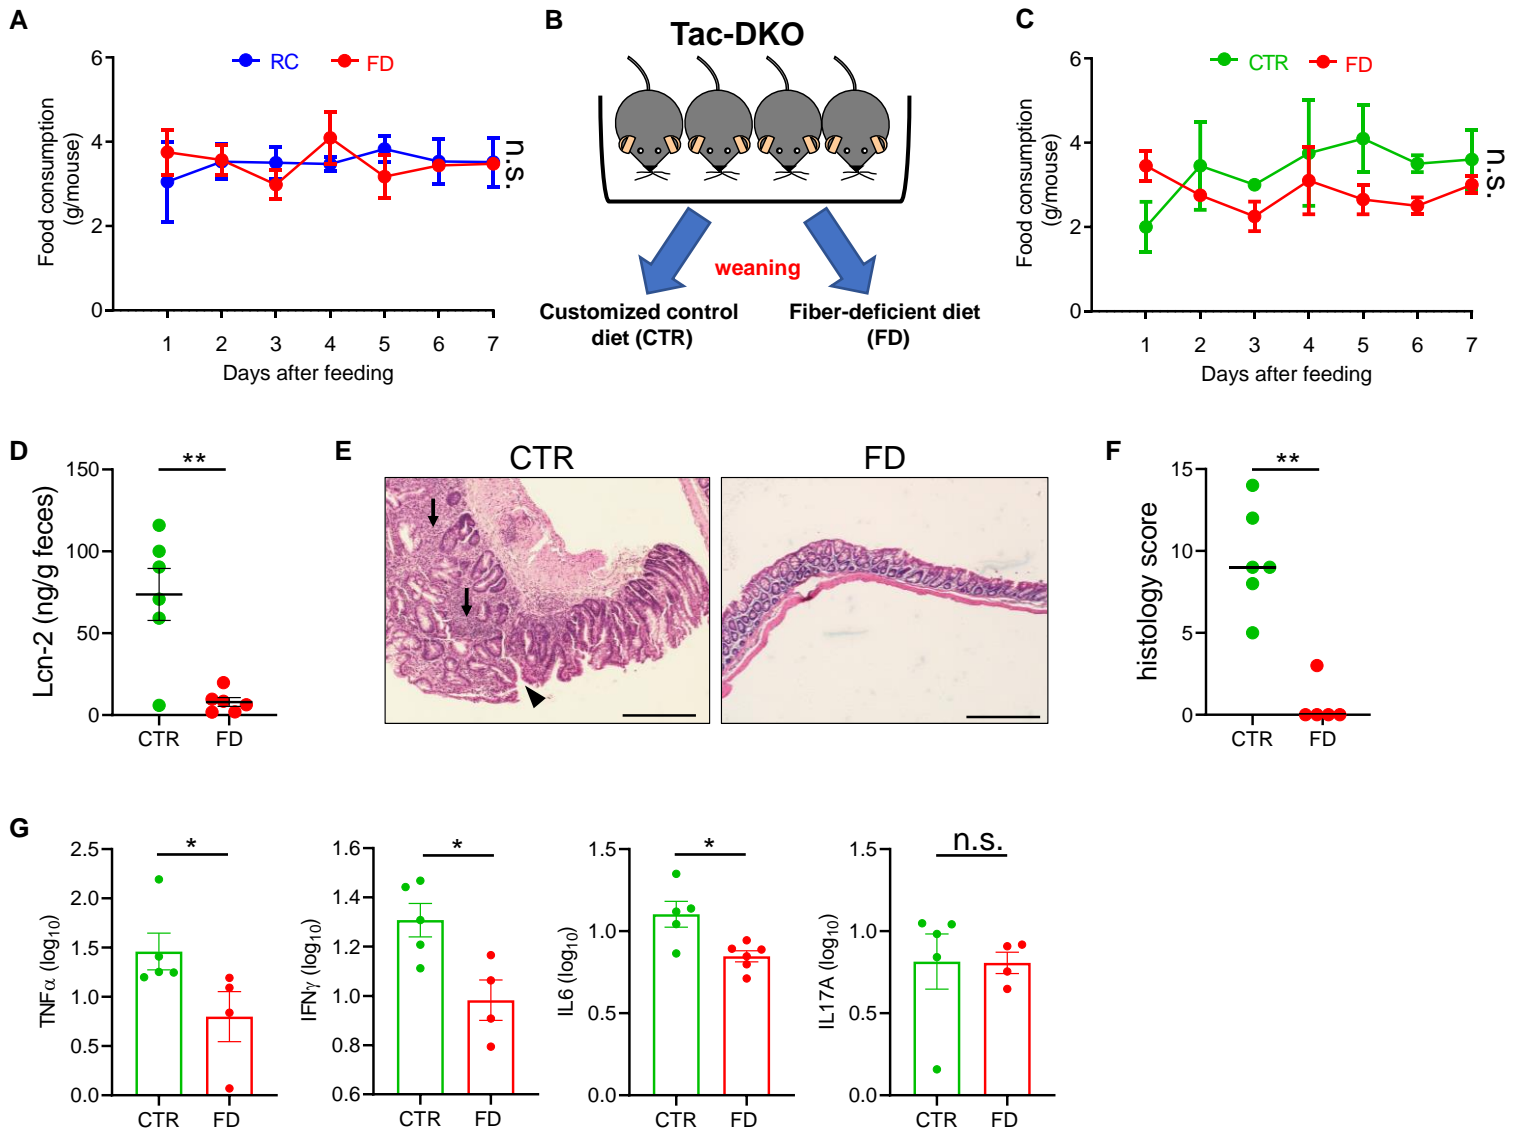

**Figure S1. Dietary fiber exclusion prevents intestinal inflammation in Tac-DKO mice fed CTR vs FD, Related to Figure 1.**

Food consumption in RC- vs FD-fed Tac-DKO mice (A) or in CTR- vs FD-fed Tac-DKO mice (C). Up to three individual cages/each diet, the amount of food consumed by each animal was calculated. (B) Schematic representation of the experimental design for feeding strategies. (D) Fecal Lcn-2 levels in Tac-DKO mice fed either the CTR or the FD mice for 9 weeks (preventive approach). (E) Representative H&E-stained colonic sections from CTR- and FD-fed Tac-DKO mice (preventive approach). Scale bar, 200  $\mu$ m. Arrowhead shows ulcer. Black arrows indicate colonic transmural inflammation. (F) Histology scores of colonic tissue from CTR-fed Tac-DKO and FD-fed Tac-DKO mice. (H) Gene expression in colonic tissue isolated from CTR-fed Tac-DKO mice and from FD-fed Tac-DKO animals normalized to GAPDH expression.

Each symbol represents one mouse. Data are mean  $\pm$  SEM (A, C, D and H), or median (F), and representative of two independent experiments, n= 4-6 per group. \* $p$ <0.05; n.s. not significant by two-way repeated measures ANOVA followed by Sidak's post-test (A and C), or by two-tailed unpaired t-test (\*\* $p$ =0.0022, D;  $p$ =n.s., H), by two-tailed Mann-Whitney U test (\*\* $p$ =0.0043).

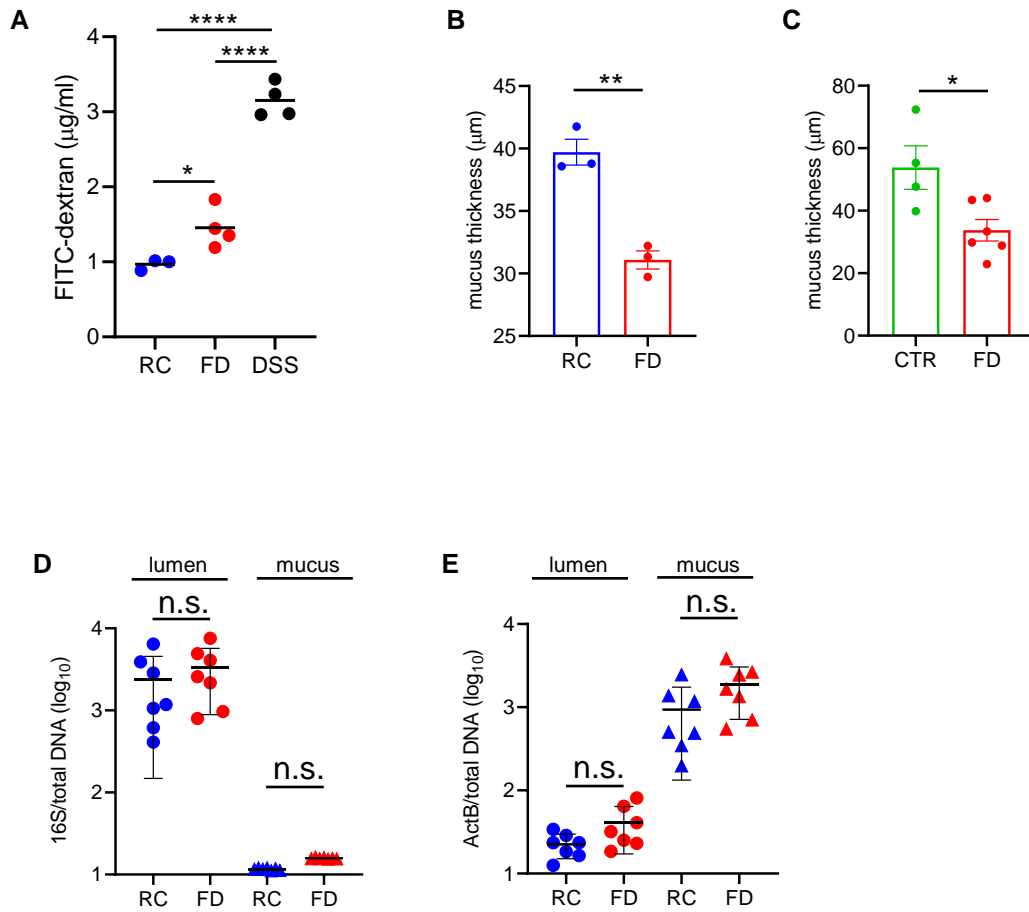

**Figure S2. Mucus thickness and intestinal permeability in Tac-DKO mice fed different diets. Bacterial and host genomic copy numbers in Tac-DKO mice fed RC vs FD diet, Related to Figure 2.**

(A) Intestinal permeability in Tac-DKO mice fed either RC or FD for three weeks (DSS-treated Tac-DKO mice, positive control). Colonic mucus layer measurements in RC-fed vs FD-fed Tac-DKO mice (therapeutic approach, B), and CTR-fed vs FD-fed Tac-DKO mice (preventive approach, C). Bacterial genome copies (D) and host genomic copy numbers (E) in intestinal luminal and mucus DNA samples isolated from RC-fed or FD-fed Tac-DKO mice.

Each symbol represents one mouse. Data are mean  $\pm$  SEM (A-C), or mean  $\pm$  SD (D-E) representative of at least two independent experiments,  $n=3-7$  per group. \* $p<0.05$ ; \*\*\*\* $p<0.0001$ ; n.s. not significant by one-way ANOVA followed by Tukey's post-test (A), or by two-tailed unpaired t-test (\*\* $p=0.0024$ , B; \* $p=0.0206$ , C;  $p=n.s.$ , D-E).

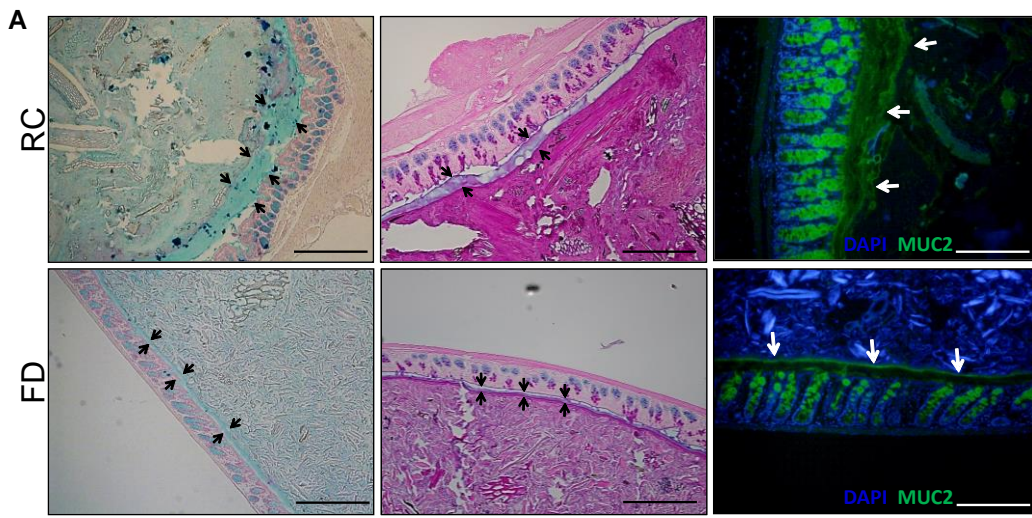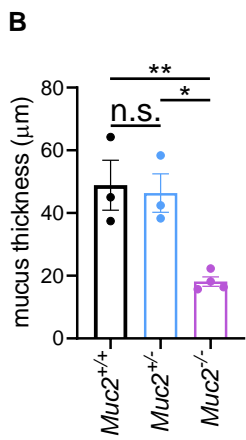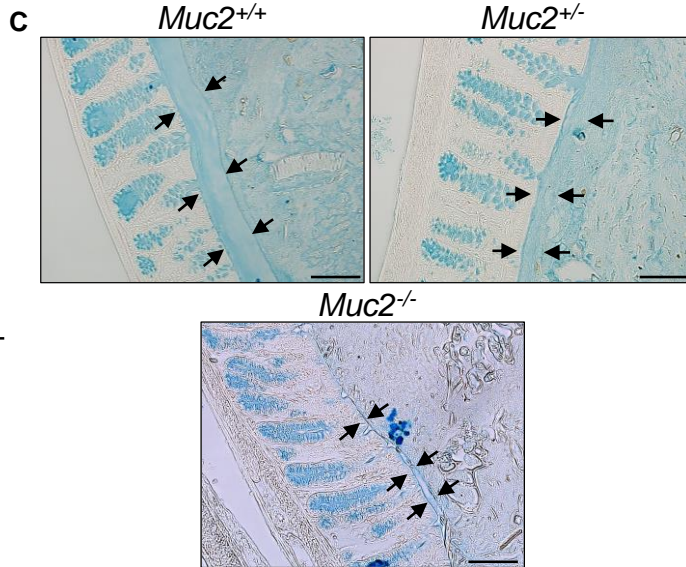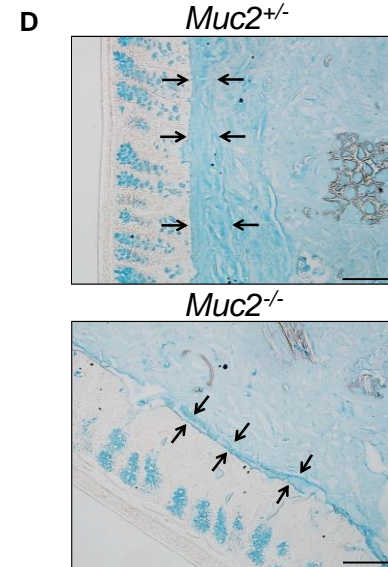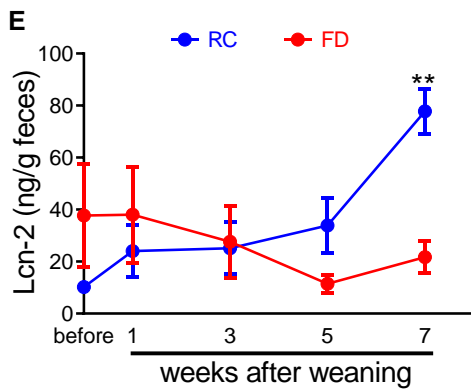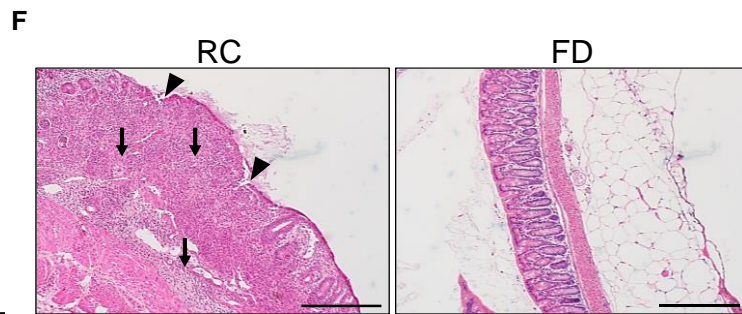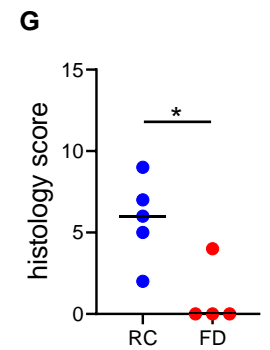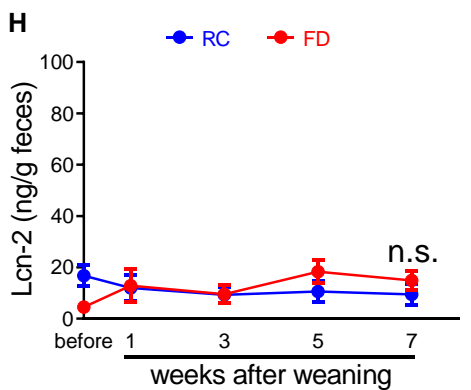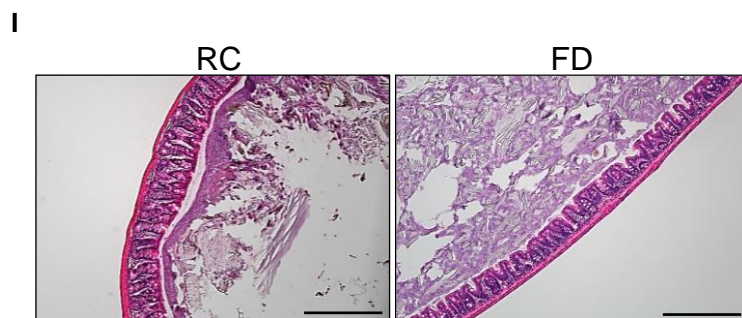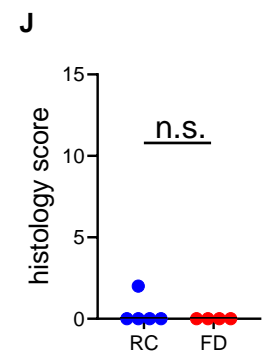

**Figure S3. Mucus thickness in Jax-DKO mice and Muc2-deficient colony. Lcn-2 levels and histological examination of Jax-DKO and Tac-DKO pups, Related to Figure 3.**

(A) Alcian blue-stained (left panel) and Alcian blue/PAS-stained (central panel) colonic sections from *Mucispirillum*-infected Jax-DKO mice fed either the RC (top panels) or the FD diet (lower panels). Opposing black arrows delineate the mucus layer. Scale bars, 200  $\mu$ m. Immunofluorescence images of colonic sections (right panel) from RC-fed (top panel) or FD-fed (lower panel) Jax-DKO mice stained with anti-Muc2 antibody (green) and DAPI (blue). White arrows indicate the mucus layer. Scale bars, 200  $\mu$ m. (B) Colonic mucus layer measurements in *Muc2*<sup>+/+</sup>, *Muc2*<sup>+/-</sup> and *Muc2*<sup>-/-</sup> mice at steady state. (C) Alcian blue-stained sections of *Muc2*<sup>+/+</sup>, *Muc2*<sup>+/-</sup> and *Muc2*<sup>-/-</sup> mice at steady state (C) or 1 day following *Mucispirillum* administration (D). Opposing black arrows delineate the mucus layer. Scale bars, 100  $\mu$ m. (E) Fecal lcn-2 levels in Tac-DKO pups fed either the RC or the FD. (F) Representative H&E-stained colonic sections from RC- and FD-fed Tac-DKO pups. Scale bar, 200  $\mu$ m. Arrowhead shows ulcer. Black arrows indicate transmural inflammation. (G) Histology scores of colonic tissue from RC-fed Tac-DKO and FD-fed Tac-DKO mice. (H) Fecal lcn-2 levels in Jax-DKO pups fed either the RC or the FD. (I) Representative H&E-stained colonic sections from RC- and FD-fed Jax-DKO pups. Scale bar, 200  $\mu$ m. (J) Histology scores of colonic tissues from RC-fed Jax-DKO and FD-fed Tac-DKO mice.

Each symbol represents one mouse. Data are mean  $\pm$  SEM (B, E and H), or median (G and J), and representative of two independent experiments, n= 3-10 per group. \*p< 0.05; \*\*p<0.01; n.s. not significant by one-way ANOVA followed by Tukey's post-test (B), by two-way repeated measures ANOVA followed by Sidak's post-test (E and H), by two-tailed Mann-Whitney U test (\*p=0.0317, G; p=n.s., J).

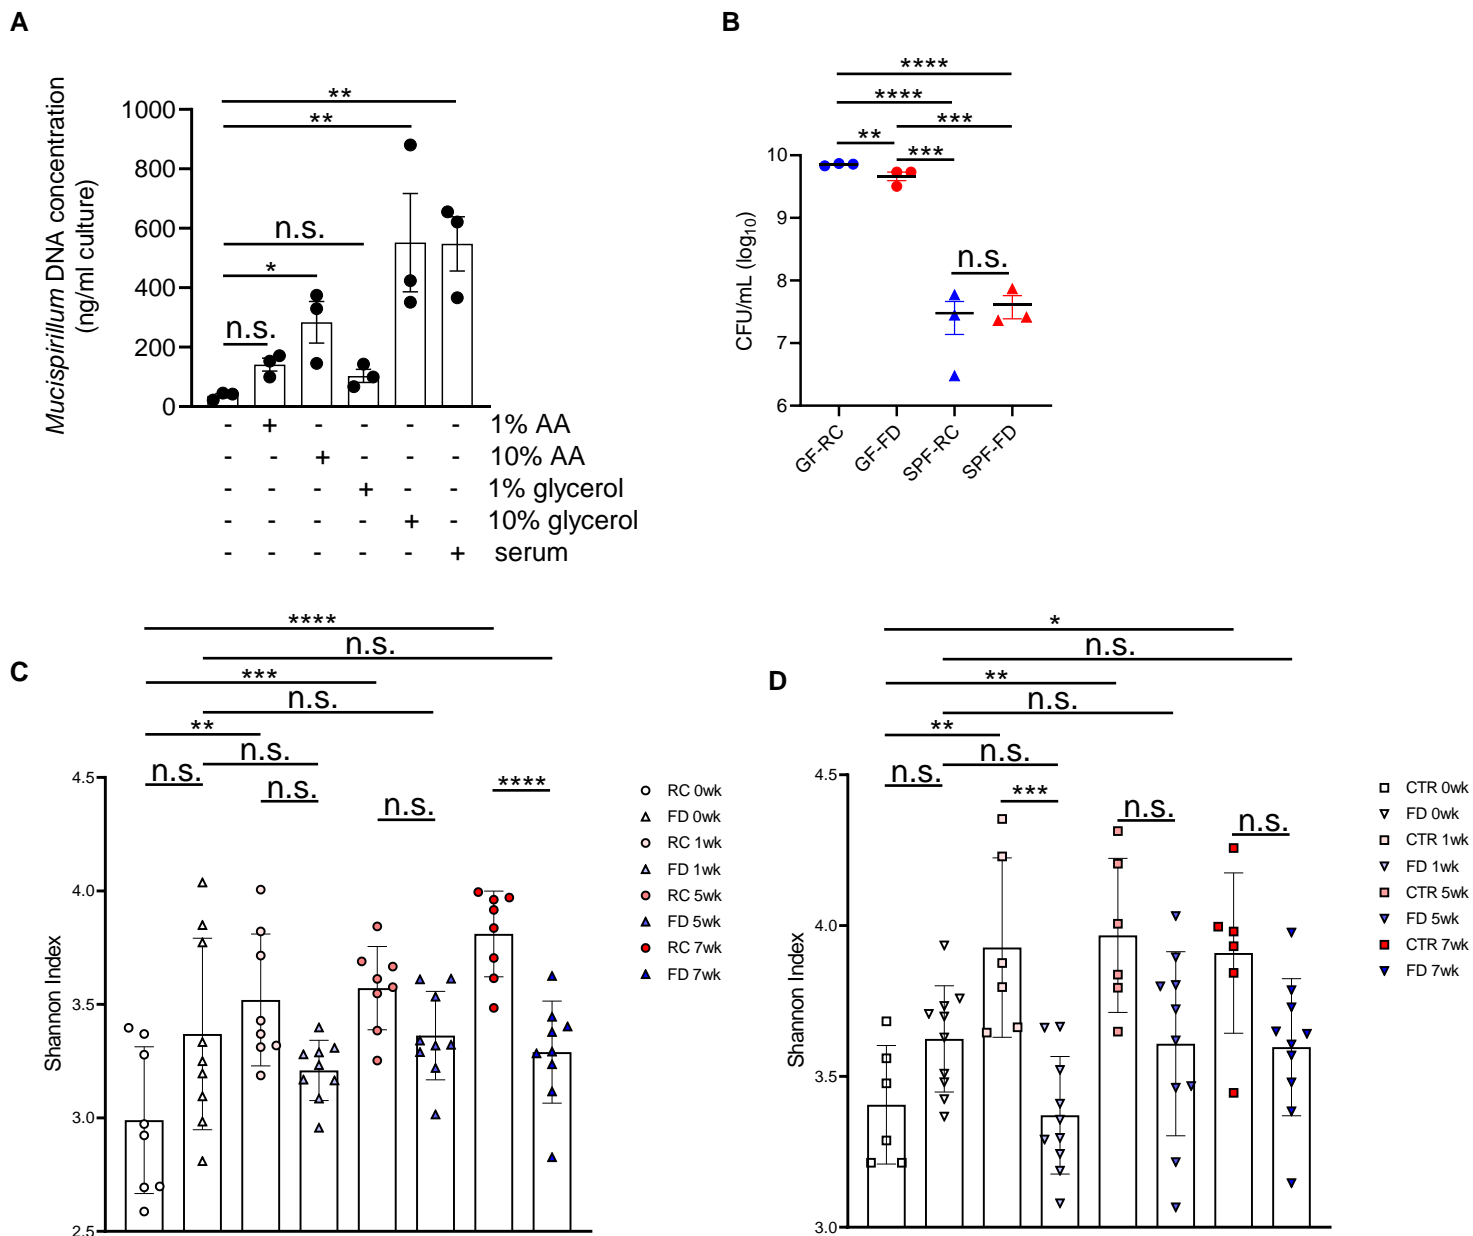

**Figure S4. *E. coli* growth in presence of SPF- and GF-derived supernatants, and  $\alpha$  diversity in the fecal microbiota of Tac-DKO mice fed different diets, Related to Figure 4.**

(A) *Mucispirillum* growth in the presence/absence of amino acids (AA) or glycerol in BHI medium (BHI medium, negative control; BHI medium with serum, positive control) after three days. (B) *E. coli* growth in cecal homogenates derived from SPF or GF mice (RC- or FD-fed) after 24 hours.  $\alpha$  diversity of fecal microbiota of Tac-DKO mice (C) or Tac-DKO mice (D).

Each symbol represents one mouse, except for panel B, in which each dot represents data pooled from 3 individual mice. Data are mean  $\pm$  SEM (A-B), or mean  $\pm$  SD (C-D), and representative of at least two independent experiments, n= 3-10 per group. \*p< 0.05; \*\*p<0.01; \*\*\*p<0.001; \*\*\*\*p<0.0001; n.s. not significant by one-way ANOVA followed by Tukey's post-test.

A

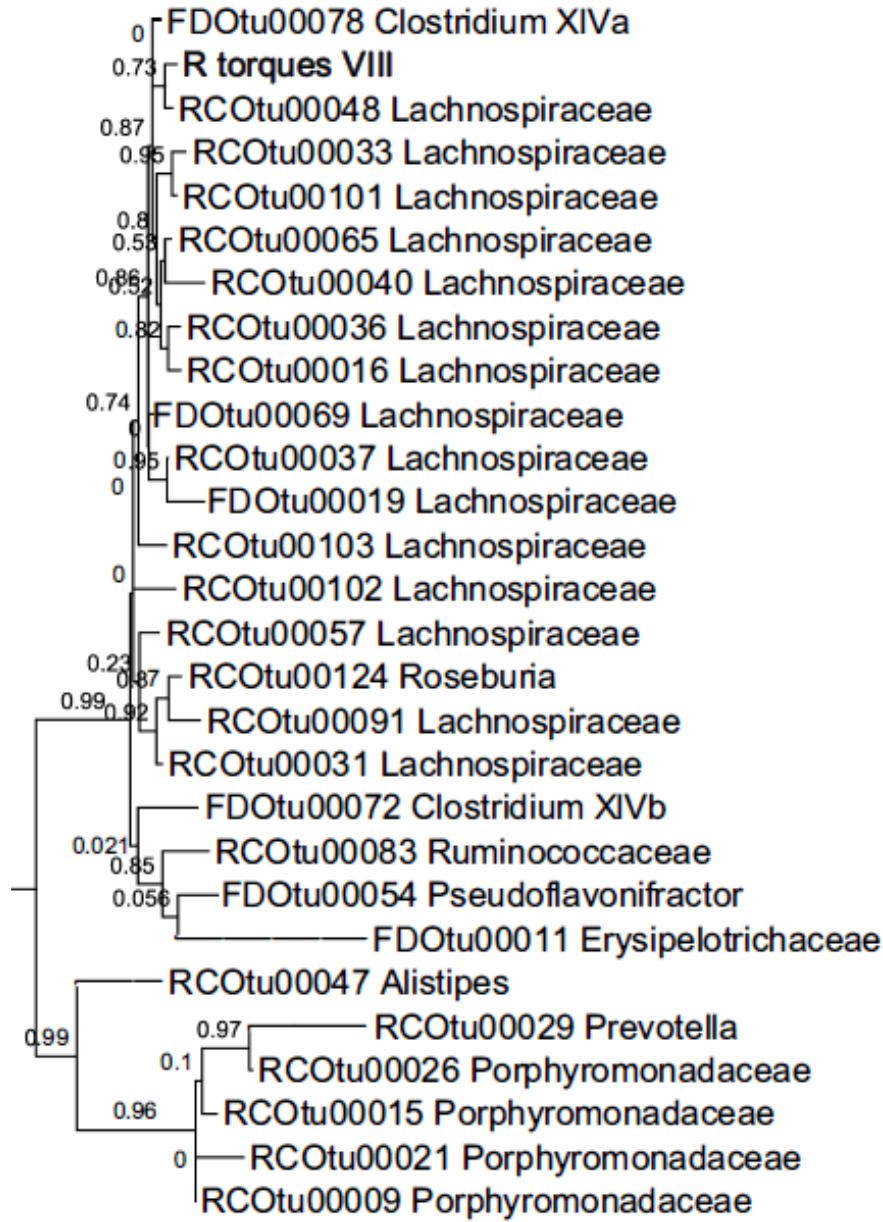

B

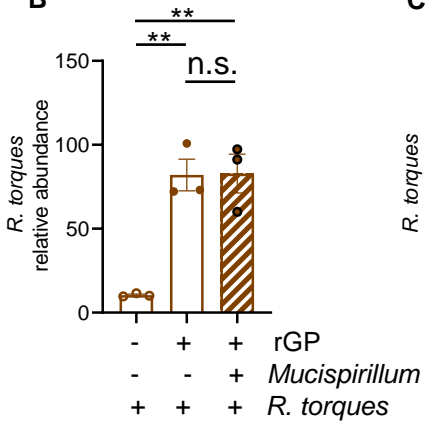

C

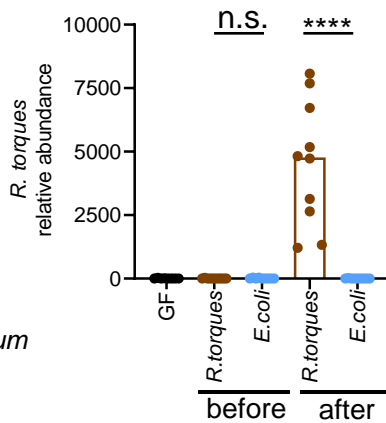

D

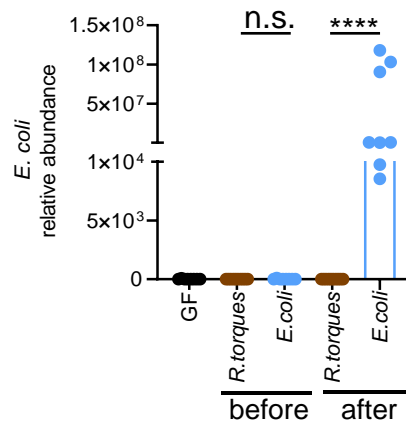

E

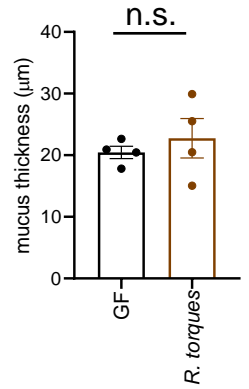

**Figure S5. Phylogenetic tree of microbial species differentially abundant in Tac-DKO mice fed RC vs FD diet. *R. torques* growth in the presence of rectal glycoproteins, and bacterial colonization levels in monoclonized mice, Related to Figure 4.**

(A) Phylogenetic tree calculated using the v4 16S rRNA sequences of the microbial species that were more abundant in RC- or FD-fed Tac-DKO mice. *R. torques* VIII was included in the clustering analysis. Numbers indicate phylogenetic distance. *R. torques* was grown in custom chopped meat broth in the presence or absence of rectal glycoproteins (rGP) or *Mucispirillum* for up to three days. (B) *R. torques* abundance was normalized to the universal 16S rRNA gene. Abundances of *R. torques* (C) or *E. coli* (D) in GF mice, in *R. torques*-monoclonized mice and in *E. coli*-monoclonized mice were normalized to the universal 16S rRNA gene. (E) Colonic mucus layer measurements in GF mice and *R. torques*-monoclonized mice.

Each symbol represents one mouse, data are mean  $\pm$  SEM (E), or median (B-D), and representative of at least two independent experiments, n= 3-10 per group. \*\*p<0.01; \*\*\*\*p<0.0001; n.s. not significant by one-way ANOVA followed by Tukey's post-test (B), by Kruskal-Wallis test followed by Dunn's post-test (C-D), or by two-tailed unpaired t-test (E).

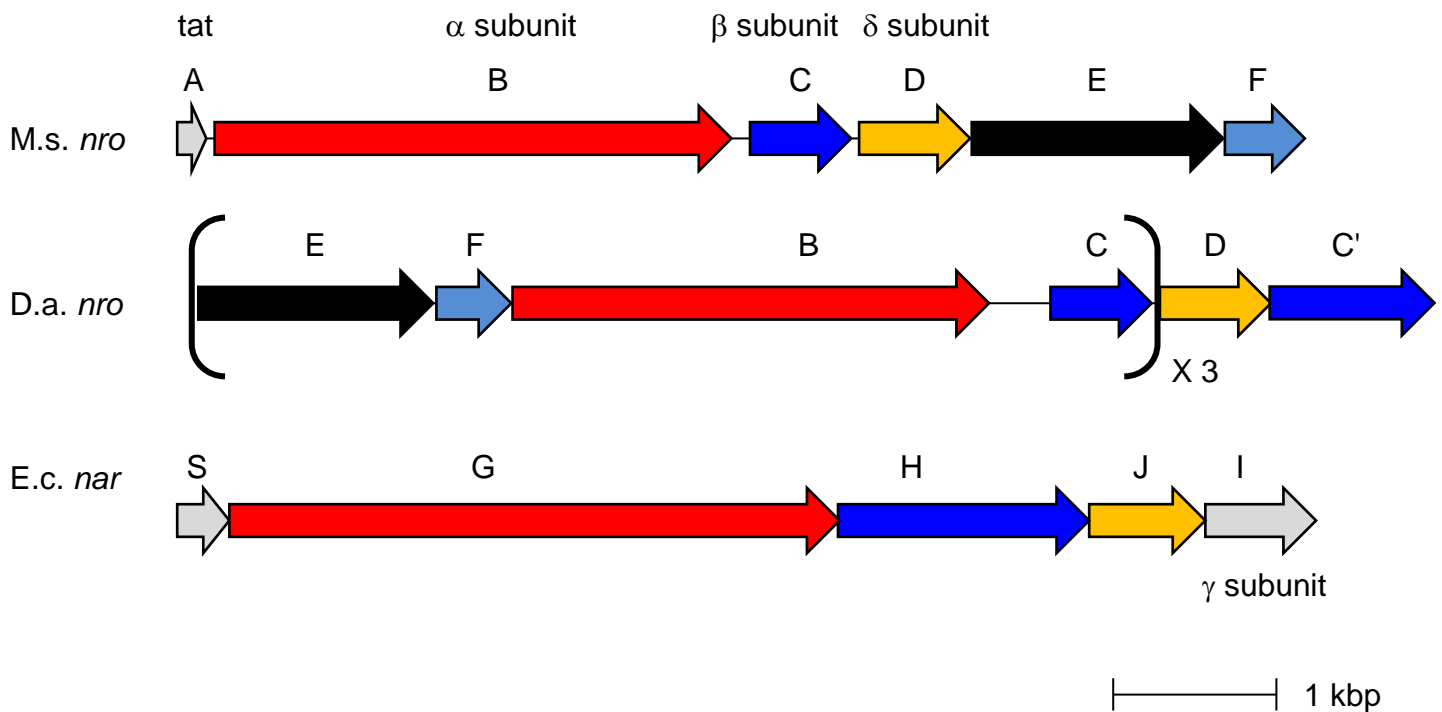

**Figure S6. *nro* operon in *Mucispirillum*, Related to Figure 5.**

Schematic of putative nitrate reductase operon *nro* found in *Mucispirillum schaedleri* (M.s.) is shown with the *E. coli* (E.c.) *nar* operon and the *Denitrovibrio acetiphilus* (D.a.) *nro* operon as the most homologous operons of *Mucispirillum*-related species. Same colors indicate homologous genes. *D. acetiphilus* has three tandem replicates of *nroE* - *nroC* homologues followed by *nroD* homologues and an additional far-related *nroC* homologue. The locus tag IDs of M.s. *nro*, D.a. *nro* and E.c. *nar* are N508\_00422 - N508\_00417 (complement) of GCA\_000487995, Dacet\_0191 - Dacet\_0208 of CP001968.1, NarS - NarI of CP009685.1, respectively.



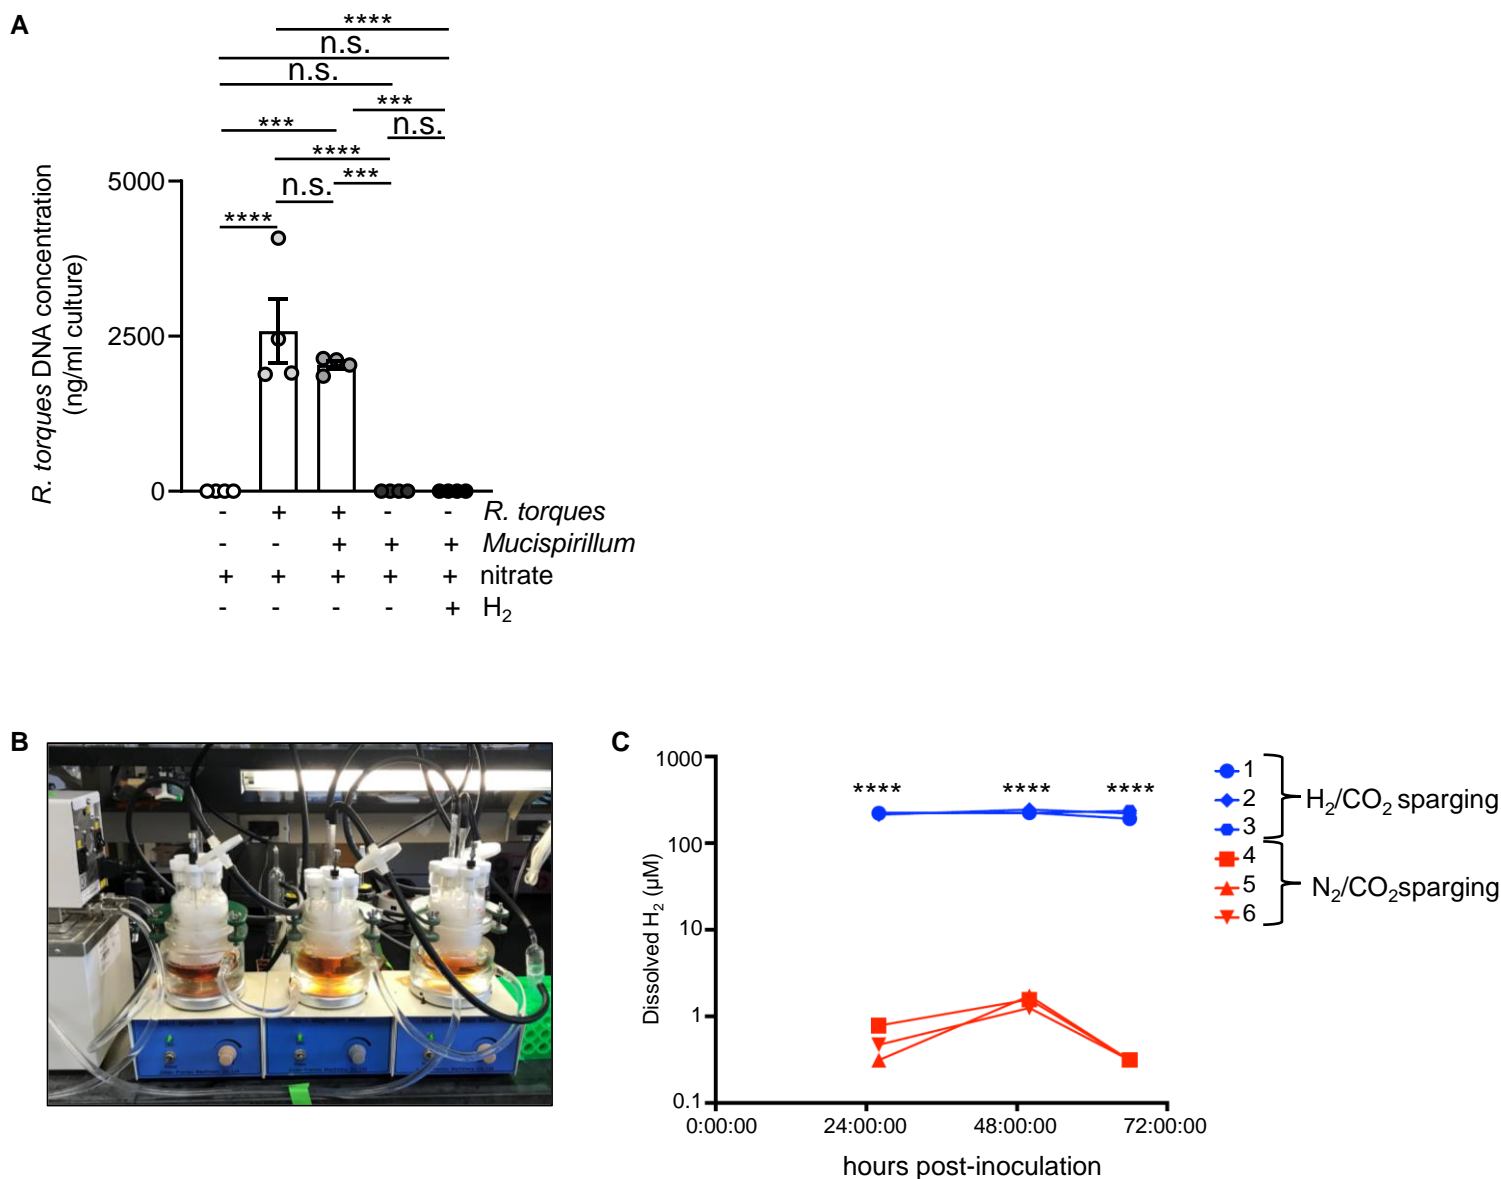

**Figure S7. *R. torques* abundance in co-culture experiments with *Mucispirillum* in the absence of exogenous H<sub>2</sub>, and concentration of dissolved H<sub>2</sub> in bioreactors, Related to Figure 6.**

(A) *R. torques* growth in the presence/absence of *Mucispirillum* in nitrate-supplemented BHI (no exogenous H<sub>2</sub> added) after three days. (B) Photograph of bioreactor vessels operated in batch mode. (C) Dissolved H<sub>2</sub> concentration at 26.5 hours post-inoculation (hpi), 50.5 hpi, and 69.5 hpi. 26.5 hours post-inoculation in either N<sub>2</sub>/CO<sub>2</sub> sparged- (n=3) or H<sub>2</sub>/CO<sub>2</sub>-sparged vessels (n=3).

Each symbol represents one mouse, data are mean ± SEM, and representative of two independent experiments, n= 3-4 per group. \*\*\*p<0.001; \*\*\*\*p<0.0001; n.s. not significant by one-way ANOVA followed by Tukey's post-test (A) or by two-way repeated measures ANOVA followed by Sidak's post-test (C).

| Name                          | Sequence 5'-3'               | Use                                       | Reference                                                                                                                                                                                                                                       |
|-------------------------------|------------------------------|-------------------------------------------|-------------------------------------------------------------------------------------------------------------------------------------------------------------------------------------------------------------------------------------------------|
| mouse TNF $\alpha$<br>qPCR Fw | GCCTCCCTCTCATCAGTTCT         | Quantitative PCR<br>of mouse TNF $\alpha$ | (Caruso et al., 2019a)                                                                                                                                                                                                                          |
| mouse TNF $\alpha$<br>qPCR Rv | CACTTGGTGGTTTGCTACGA         | Quantitative PCR<br>of mouse TNF $\alpha$ | (Caruso et al., 2019a)                                                                                                                                                                                                                          |
| mouse IFN $\gamma$<br>qPCR Fw | TCAAGTGGCATAGATGTGGAAG<br>AA | Quantitative PCR<br>of mouse IFN $\gamma$ | (Caruso et al., 2019a)                                                                                                                                                                                                                          |
| mouse IFN $\gamma$<br>qPCR Rv | TGGCTCTGCAGGATTTTCATG        | Quantitative PCR<br>of mouse IFN $\gamma$ | (Caruso et al., 2019a)                                                                                                                                                                                                                          |
| mouse IL-17A<br>qPCR Fw       | GGA CTCTCCACCGCAATGA         | Quantitative PCR<br>of mouse IL-17A       | (Caruso et al., 2019a)                                                                                                                                                                                                                          |
| mouse IL-17A<br>qPCR Rv       | GGCACTGAGCTTCCCAGATC         | Quantitative PCR<br>of mouse IL-17A       | (Caruso et al., 2019a)                                                                                                                                                                                                                          |
| mouse IL-6<br>qPCR Fw         | CTGCAAGAGACTTCCATCCAGTT      | Quantitative PCR<br>of mouse IL-6         | (Caruso et al., 2019a)                                                                                                                                                                                                                          |
| mouse IL-6<br>qPCR Rv         | AAGTAGGGAAGGCCGTGGTT         | Quantitative PCR<br>of mouse IL-6         | (Caruso et al., 2019a)                                                                                                                                                                                                                          |
| mouse Muc2<br>qPCR Fw         | CCCAGAAGGGACTGTGTATG         | Quantitative PCR<br>of mouse Muc2         | (Bergstrom et al., 2012)                                                                                                                                                                                                                        |
| mouse Muc2<br>qPCR Rv         | TTGTGTTTCGCTCTTGGTCAG        | Quantitative PCR<br>of mouse Muc2         | (Bergstrom et al., 2012)                                                                                                                                                                                                                        |
| mouse Muc5ac<br>qPCR Fw       | GGTTGTCGATGCAGCCTTGCTT       | Quantitative PCR<br>of mouse Muc5ac       | (Liu et al., 2021)                                                                                                                                                                                                                              |
| mouse Muc5ac<br>qPCR Rv       | CCACTTTCTCCTTCTCCACACC       | Quantitative PCR<br>of mouse Muc5ac       | (Liu et al., 2021)                                                                                                                                                                                                                              |
| mouse Tff1<br>qPCR Fw         | CAGGCCAGGCCAGGAAGA           | Quantitative PCR<br>of mouse Tff1         | <a href="https://www.origene.com/catalog/gene-expression/qpcr-primer-pairs/mp217526/tff1-mouse-qpcr-primer-pair-nm_009362">https://www.origene.com/catalog/gene-expression/qpcr-primer-pairs/mp217526/tff1-mouse-qpcr-primer-pair-nm_009362</a> |
| mouse Tff1<br>qPCR Rv         | CTGTCATCAAACAGCAACCTCT<br>C  | Quantitative PCR<br>of mouse Tff1         | <a href="https://www.origene.com/catalog/gene-expression/qpcr-primer-pairs/mp217526/tff1-mouse-qpcr-primer-pair-nm_009362">https://www.origene.com/catalog/gene-expression/qpcr-primer-pairs/mp217526/tff1-mouse-qpcr-primer-pair-nm_009362</a> |
| mouse Tff3<br>qPCR Fw         | CTCTGTCACATCGGAGCAGTGT       | Quantitative PCR<br>of mouse Tff3         | (Bergstrom et al., 2012)                                                                                                                                                                                                                        |
| mouse Tff3<br>qPCR Rv         | TGAAGCACCAGGGCACATT          | Quantitative PCR<br>of mouse Tff3         | (Bergstrom et al., 2012)                                                                                                                                                                                                                        |
| mouse KLF3<br>qPCR Fw         | CCTCTCATGGTTTCCTTGTCGG       | Quantitative PCR<br>of mouse KLF3         | <a href="https://www.origene.com/catalog/gene-expression/qpcr-primer-pairs/mp207224/klf3-mouse-qpcr-primer-pair-nm_008453">https://www.origene.com/catalog/gene-expression/qpcr-primer-pairs/mp207224/klf3-mouse-qpcr-primer-pair-nm_008453</a> |
| mouse KLF3<br>qPCR Rv         | CCTCTGTGGTTCAATTCCAGGC       | Quantitative PCR<br>of mouse KLF3         | <a href="https://www.origene.com/catalog/gene-expression/qpcr-primer-pairs/mp207224/klf3-mouse-qpcr-primer-pair-nm_008453">https://www.origene.com/catalog/gene-expression/qpcr-primer-pairs/mp207224/klf3-mouse-qpcr-primer-pair-nm_008453</a> |
| mouse-<br>GAPDH qPCR<br>Fw    | CACCATCTTCCAGGAGCGAG         | Quantitative PCR<br>of mouse GAPDH        | (Caruso et al., 2019a)                                                                                                                                                                                                                          |

|                                            |                              |                                                           |                        |
|--------------------------------------------|------------------------------|-----------------------------------------------------------|------------------------|
| mouse-<br>GAPDH qPCR<br>Rv                 | GCCTTCTCCATGGTGGTGAA         | Quantitative PCR<br>of mouse GAPDH                        | (Caruso et al., 2019a) |
| mouse- Actin<br>qPCR Fw                    | CTCTCAGCTGTGGTGGTGAA         | Quantitative PCR<br>of mouse <i>Actin</i>                 | (Chen et al., 2021)    |
| mouse- Actin<br>qPCR Rv                    | AGCCATGTACGTAGCCATCC         | Quantitative PCR<br>of mouse <i>Actin</i>                 | (Chen et al., 2021)    |
| <i>Mucipirillum</i><br><i>nroA</i> qPCR Fw | AGAAAGCTCAGTATCAAGGCGT       | Quantitative PCR<br>of <i>Mucipirillum</i><br><i>nroA</i> | This study             |
| <i>Mucipirillum</i><br><i>nroA</i> qPCR Rv | CTGCCATCTTTAGAGCAGCCAT       | Quantitative PCR<br>of <i>Mucipirillum</i><br><i>nroA</i> | This study             |
| <i>Mucipirillum</i><br><i>nroB</i> qPCR Fw | ATCATGGGGGCAGACTGGTG         | Quantitative PCR<br>of <i>Mucipirillum</i><br><i>nroB</i> | This study             |
| <i>Mucipirillum</i><br><i>nroB</i> qPCR Rv | GCAGGGCTGCTTGGAACATC         | Quantitative PCR<br>of <i>Mucipirillum</i><br><i>nroB</i> | This study             |
| <i>Mucipirillum</i><br><i>nroC</i> qPCR Fw | GCCGCATGCTCACAAAATGC         | Quantitative PCR<br>of <i>Mucipirillum</i><br><i>nroC</i> | This study             |
| <i>Mucipirillum</i><br><i>nroC</i> qPCR Rv | TGAGTGGCAGCAAATGGACA         | Quantitative PCR<br>of <i>Mucipirillum</i><br><i>nroC</i> | This study             |
| <i>Mucipirillum</i><br><i>nroD</i> qPCR Fw | TCAACAGTCAAGGGAACAGGTG       | Quantitative PCR<br>of <i>Mucipirillum</i><br><i>nroD</i> | This study             |
| <i>Mucipirillum</i><br><i>nroD</i> qPCR Rv | GTCATAGGCAATAAAGTCTTCT<br>GG | Quantitative PCR<br>of <i>Mucipirillum</i><br><i>nroD</i> | This study             |
| <i>Mucipirillum</i><br><i>nroE</i> qPCR Fw | TATACGGCGGTCTGCCTGTC         | Quantitative PCR<br>of <i>Mucipirillum</i><br><i>nroE</i> | This study             |
| <i>Mucipirillum</i><br><i>nroE</i> qPCR Rv | GCCTCTGGCAGTATGGGTGT         | Quantitative PCR<br>of <i>Mucipirillum</i><br><i>nroE</i> | This study             |
| <i>Mucipirillum</i><br><i>nroF</i> qPCR Fw | CCATGCCCCGAGCAGGATTTG        | Quantitative PCR<br>of <i>Mucipirillum</i><br><i>nroF</i> | This study             |
| <i>Mucipirillum</i><br><i>nroF</i> qPCR Rv | TCACAGTATGCAGAGCACCTGA       | Quantitative PCR<br>of <i>Mucipirillum</i><br><i>nroF</i> | This study             |
| <i>Mucipirillum</i><br><i>ubiD</i> qPCR Fw | CGCAGGGAAGGTCCTTTTGG         | Quantitative PCR<br>of <i>Mucipirillum</i><br><i>ubiD</i> | This study             |
| <i>Mucipirillum</i><br><i>ubiD</i> qPCR Rv | GCAGTCTTCATAGGCGGCTT         | Quantitative PCR<br>of <i>Mucipirillum</i><br><i>ubiD</i> | This study             |

|                                 |                                 |                                                              |                           |
|---------------------------------|---------------------------------|--------------------------------------------------------------|---------------------------|
| <i>Mucipirillum nth</i> qPCR Fw | AGTGCCGGGGATGGTTGTAG            | Quantitative PCR of <i>Mucipirillum nth</i>                  | This study                |
| <i>Mucipirillum nth</i> qPCR Fw | TGCCAAACAGCACAAGCTGA            | Quantitative PCR of <i>Mucipirillum nth</i>                  | This study                |
| <i>Mucipirillum gap</i> qPCR Fw | CCCTGCTAATCTTCCTGGGCTA          | Quantitative PCR of <i>Mucipirillum gap</i>                  | This study                |
| <i>Mucipirillum gap</i> qPCR Rv | TGGGTCTGTTGCTGGTGCAG            | Quantitative PCR of <i>Mucipirillum gap</i>                  | This study                |
| <i>Mucipirillum</i> qPCR Fw     | TCTCTTCGGGGATGATTAAAC           | Quantitative PCR of <i>Mucipirillum</i>                      | (Gomes-Neto et al., 2017) |
| <i>Mucipirillum</i> qPCR Rv     | AACTTTTCCTATATAAACATGCAC        | Quantitative PCR of <i>Mucipirillum</i>                      | (Gomes-Neto et al., 2017) |
| <i>R. torques</i> VIII qPCR Fw  | TCTAGAGTGCTGGAGAGGTAAG          | Quantitative PCR of <i>R. torques</i> VIII                   | This study                |
| <i>R. torques</i> VIII qPCR Rv  | GGGATGTCAAGAGCAGGTAAG           | Quantitative PCR of <i>R. torques</i> VIII                   | This study                |
| <i>E. coli</i> qPCR Fw          | GAGTAAAGTTAATACCTTTGCTC<br>ATTG | Quantitative PCR of <i>E. coli</i>                           | (Kitamoto et al., 2020)   |
| <i>E. coli</i> qPCR Rv          | GAGACTCAAGCTKRCCAGTATCA<br>G    | Quantitative PCR of <i>E. coli</i>                           | (Kitamoto et al., 2020)   |
| <i>A. muciniphila</i> qPCR Fw   | AGAGGTCTCAAGCGTTGTTCCG<br>AA    | Quantitative PCR of <i>A. muciniphila</i>                    | (Seregin et al., 2017)    |
| <i>A. muciniphila</i> qPCR Rv   | TTTCGCTCCCCTGGCCTTCGTGC         | Quantitative PCR of <i>A. muciniphila</i>                    | (Seregin et al., 2017)    |
| Bacterial 16S (8F) qPCR Fw      | AGAGTTTGATCCTGGCTCAG            | Quantitative PCR of bacterial 16S ( <i>in vivo</i> studies)  | (Caruso et al., 2019a)    |
| Bacterial 16S (338R) qPCR Rv    | TGCTGCCTCCCGTAGGAGT             | Quantitative PCR of bacterial 16S ( <i>in vivo</i> studies)  | (Caruso et al., 2019a)    |
| Bacterial 16S (341F) qPCR Fw    | CCTACGGGAGGCAGCAG               | Quantitative PCR of bacterial 16S ( <i>in vitro</i> studies) | (Chen et al., 2021)       |
| Bacterial 16S (518R) qPCR Rv    | ATTACCGCGGCTGCTGG               | Quantitative PCR of bacterial 16S ( <i>in vitro</i> studies) | (Chen et al., 2021)       |

**Table S7. Primers used in this study, Related to Figures 1 to 6, to Figures S1, S2, S3, S4 and S7, Star Methods.**
